# Supplementary material for: Data for the generation of RNA spatiotemporal distributions and interpretation of Chk1 and SLBP protein depletion phenotypes during Drosophila embryogenesis
Source: PubMed Central journal article supplement (PMC5440278; doi:10.1016/j.dib.2017.05.008), 2017-05-13
Supplement: mmc3.pdf [file mmc3.pdf]

**0-45 minutes AEL**

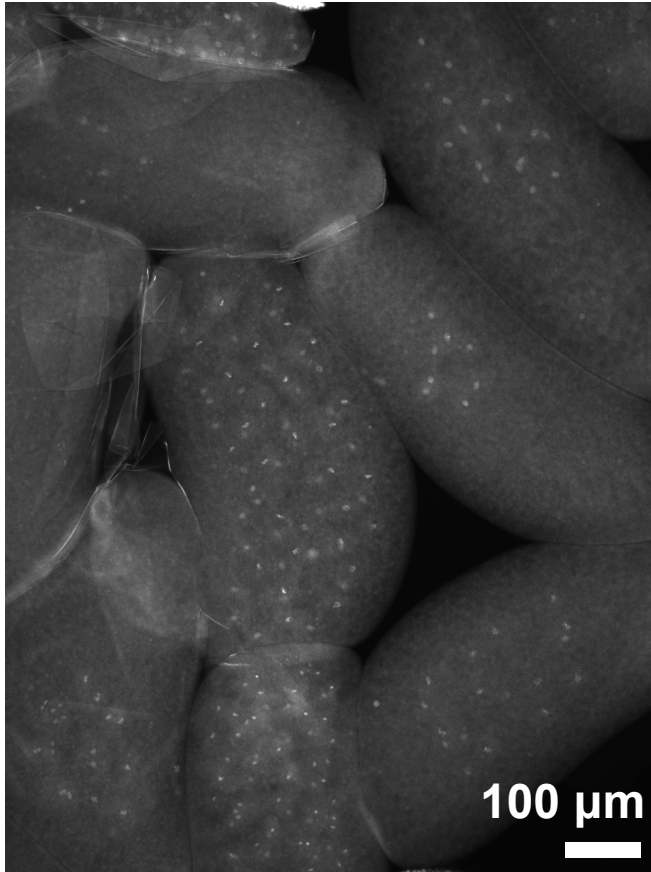

**Mitotic cycles 2-9**

**90-180 minutes AEL**

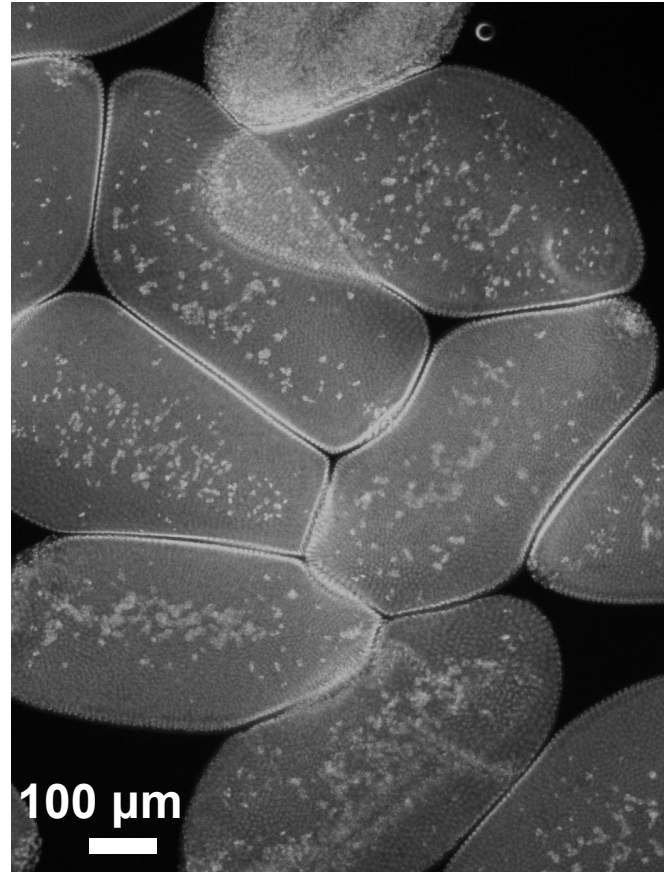

**Mitotic cycles 10-13**
