# Supplementary material for: Data for the generation of RNA spatiotemporal distributions and interpretation of Chk1 and SLBP protein depletion phenotypes during Drosophila embryogenesis
Source: PubMed Central journal article supplement (PMC5440278; doi:10.1016/j.dib.2017.05.008), 2017-05-13

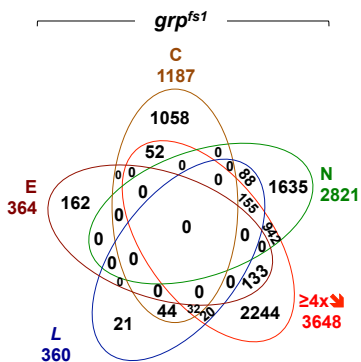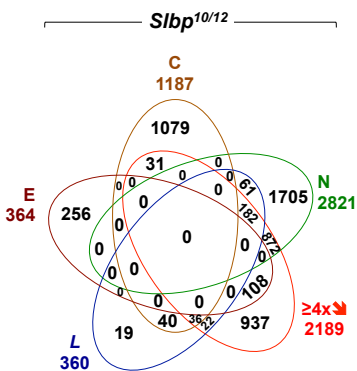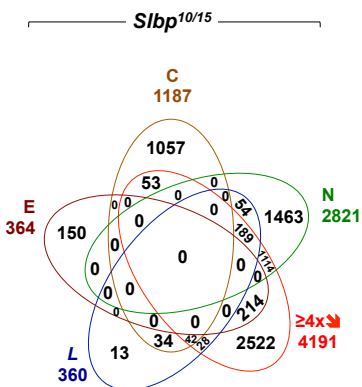

Supplement: mmc4.pdf [file mmc4.pdf]
